# Supplementary material
Source: PubMed Central journal article supplement (PMC6795328)
Supplement: JGMED19003361.pdf [file JGMED19003361.pdf]

Feinstein M, Niforatos JD, Mosteller L, Chelnick D, Raza S, Otteson T. Association of Doximity ranking and residency program characteristics across 16 specialty training programs. *J Grad Med Educ.* 2019;11(5):580–584.

### Supplemental Material

#### TABLE

#### Reasons for Exclusion from Analysis

| <b>Specialty</b>                      | <b>Reason for exclusion from analysis</b>               |
|---------------------------------------|---------------------------------------------------------|
| Child neurology                       | Founding year data anomalous                            |
| Interventional radiology (integrated) | "Sort by rank" option unavailable                       |
| Medical genetics                      | "Sort by rank" option unavailable                       |
| Medicine/Pediatrics                   | Founding year data anomalous                            |
| Nuclear medicine                      | BRIMR does not report NIH funding for this specialty    |
| Ophthalmology                         | Founding year unavailable for more than 20% of programs |
| Plastic surgery                       | BRIMR does not report NIH funding for this specialty    |
| Preventive medicine                   | "Sort by rank" option unavailable                       |
| Radiation oncology                    | BRIMR does not report NIH funding for this specialty    |
| Surgery                               | Founding year unavailable for more than 20% of programs |
| Thoracic surgery (integrated)         | "Sort by rank" option unavailable                       |
| Vascular surgery (integrated)         | "Sort by rank" option unavailable                       |

Feinstein M, Niforatos JD, Mosteller L, Chelnick D, Raza S, Otteson T. Association of Doximity ranking and residency program characteristics across 16 specialty training programs. *J Grad Med Educ.* 2019;11(5):580–584.

**TABLE**

R2 Values for Models and Parameter Estimates for Departmental NIH Funding, Association with *US News & World Report* Ranked Medical School, and Residency Program Age

|                         | Parameter estimate for total # residents and Doximity rank |                     |         | Parameter estimate for 2018 NIH funding (per \$100,000) and Doximity rank |         | Parameter estimate for 2019 USNWR-ranked medical school (yes or no) and Doximity rank |         | Parameter estimate for residency program age (in years) and Doximity rank |         | R2 for model | Programs excluded due to missing data (%) |
|-------------------------|------------------------------------------------------------|---------------------|---------|---------------------------------------------------------------------------|---------|---------------------------------------------------------------------------------------|---------|---------------------------------------------------------------------------|---------|--------------|-------------------------------------------|
|                         | Parameter estimate                                         | Confidence interval | P-Value | Parameter estimate                                                        | P-Value | Parameter estimate                                                                    | P-Value | Parameter estimate                                                        | P-Value |              |                                           |
| Anesthesiology          | -0.797                                                     | -0.982, -0.6127     | < 0.001 | -0.284                                                                    | 0.003   | 19.455                                                                                | < 0.001 | -0.308                                                                    | 0.005   | 0.720        | 1.97%                                     |
| Dermatology             | -3.519                                                     | -4.482, -2.5572     | < 0.001 | -0.345                                                                    | 0.027   | 14.748                                                                                | 0.005   | -0.330                                                                    | 0.004   | 0.616        | 6.29%                                     |
| Emergency medicine      | -1.533                                                     | -1.957, -1.109      | < 0.001 | -0.211                                                                    | 0.263   | 30.759                                                                                | < 0.001 | -2.364                                                                    | < 0.001 | 0.710        | 2.94%                                     |
| Family medicine         | -4.54                                                      | -5.88, -3.190       | < 0.001 | -1.16                                                                     | 0.207   | 93.42                                                                                 | < 0.001 | -4.880                                                                    | < 0.001 | 0.501        | 6.57%                                     |
| Internal medicine       | -1.4612                                                    | -1.7560, -1.1663    | < 0.001 | -0.0242                                                                   | 0.48    | 86.8442                                                                               | < 0.001 | -2.291                                                                    | < 0.001 | 0.661        | 0.94%                                     |
| Neurology               | -1.3952                                                    | -2.032, -0.7584     | < 0.001 | -0.086                                                                    | < 0.001 | 19.7116                                                                               | 0.003   | -0.517                                                                    | < 0.001 | 0.628        | 14.94%                                    |
| Neurosurgery            | -3.824                                                     | -4.693, -2.9552     | < 0.001 | -0.12                                                                     | 0.144   | 13.769                                                                                | 0.005   | -0.107                                                                    | 0.294   | 0.672        | 5.98%                                     |
| Obstetrics & gynecology | -3.543                                                     | -4.356, -2.73026    | < 0.001 | -0.384                                                                    | 0.047   | 51.674                                                                                | < 0.001 | -0.935                                                                    | < 0.001 | 0.650        | 9.96%                                     |
| Orthopedic surgery      | -2.324                                                     | -2.945, -1.703      | < 0.001 | -0.496                                                                    | 0.006   | 24.225                                                                                | < 0.001 | -0.678                                                                    | < 0.001 | 0.640        | 16.92%                                    |

Feinstein M, Niforatos JD, Mosteller L, Chelnick D, Raza S, Otteson T. Association of Doximity ranking and residency program characteristics across 16 specialty training programs. *J Grad Med Educ.* 2019;11(5):580–584.

|                        |          |                   |            |          |       |          |         |        |         |       |        |
|------------------------|----------|-------------------|------------|----------|-------|----------|---------|--------|---------|-------|--------|
| Otolaryngology         | -3.905   | -4.504, -3.3059   | <<br>0.001 | -0.147   | 0.008 | 13.689   | < 0.001 | -0.196 | 0.014   | 0.814 | 4.96%  |
| Pathology              | -3.015   | -3.691, -2.3393   | <<br>0.001 | -0.0732  | 0.023 | 12.5521  | 0.022   | -0.254 | 0.084   | 0.630 | 6.99%  |
| Pediatrics             | -1.0989  | -1.292, -0.90613  | <<br>0.001 | -0.0668  | 0.041 | 34.1403  | < 0.001 | -0.379 | < 0.001 | 0.723 | 0.47%  |
| Phys. Med. & Rehab.    | -1.033   | -1.628, -0.43712  | <<br>0.001 | -0.398   | 0.049 | 23.466   | < 0.001 | -0.131 | 0.189   | 0.567 | 5.62%  |
| Psychiatry             | -1.7208  | -2.1717, -1.2698  | <<br>0.001 | -0.0323  | 0.273 | 31.487   | < 0.001 | -1.220 | < 0.001 | 0.738 | 4.82%  |
| Radiology (diagnostic) | -1.813   | -2.347, -1.2789   | <<br>0.001 | -0.113   | 0.012 | 33.863   | < 0.001 | -0.561 | 0.006   | 0.679 | 17.95% |
| Urology                | -6.32324 | -7.6934, -4.95312 | <<br>0.001 | -0.59005 | 0.003 | 13.11436 | 0.013   | -0.007 | 0.396   | 0.595 | 2.13%  |

Abbreviations: Phys. Med. & Rehab, Physical Medicine and Rehabilitation; NIH, National Institutes of Health; USNWR, *US News & World Report*.

Note: The negative value of the beta for the program-size relationship indicates that a larger residency program correlates with a lower (ie, improved) rank number.
